# Supplementary material for: Green gentrification in European and North American cities
Source: PubMed Central journal article supplement (PMC9250502; doi:10.1038/s41467-022-31572-1), 2022-07-02
Supplement: 41467_2022_31572_MOESM3_ESM.pdf [file 41467_2022_31572_MOESM3_ESM.pdf]

## Description of Additional Supplementary Information

**Title:** Supplementary Data

**Description:** In the results reported, the value of p corresponds to the probability that the parameter is greater than 0 and so, large values imply relevant positive effects while small values imply relevant negative effects. The variable codes used in the supplementary data file are:  
CH\_GSAB\_PRE2: Changes in greenspace prior to Period 2 CH\_GSAB\_PRE3: Changes in greenspace prior to Period 3 CENTER: Distance from the centroid of the tract to the approximate centerpoint of the historic city center TRACTDENSITY\_2010:

Residential density of the tract in 2010 PRE\_1990\_GREEN: Percent of area of the tract covered in greenspace prior to 1990 NEWTRANSITB\_PRE2: Number of new transit stops added to the tract prior to Period 2 NEWTRANSITB\_PRE3: Number of new transit stops added to the tract prior to Period 3 DEV\_TIME2: Number of new residential buildings constructed in the tract during Period 2 DEV\_TIME3: Number of new residential buildings constructed in the tract during Period 3 DEV\_TIME23: Number of new residential buildings constructed in the tract during Periods 2 and 3
